# Supplementary material
Source: HighWire-hosted journal article supplement (https://www.cmajopen.ca/content/suppl/2020/03/03/8.1.E121)
Supplement: 2019-0009-3-at.pdf [file 2019-0009-3-at.pdf]

### Appendix 3 (as supplied by the authors): Community Advisory Group membership

| Member name      | Role, Organization                                                               | Target population supported by outreach                           |
|------------------|----------------------------------------------------------------------------------|-------------------------------------------------------------------|
| Toby Stewart     | HQO Patient and Family Advisors Council                                          | Rural, multiple admissions                                        |
| Lucie Allard     | HQO Patient and Family Advisors Council                                          | Francophone, multiple admissions                                  |
| Cathy Bachner    | HQO Patient and Family Advisors Council                                          | Multiple Admissions                                               |
| Samira Chandani  | HQO Patient and Family Advisors Council                                          | New immigrant and refugee, socially isolated, Multiple Admissions |
| Julio Santos     | Patient Advisory, Health Links                                                   | Multiple Admissions                                               |
| Hanaa Elkalza    | Regional Patient and Caregiver Engagement Coordinator, Health Links              | Multiple Admissions                                               |
| Chantal Bohemier | Planning and Community Engagement Office, RMEFNO                                 | Francophone                                                       |
| Karen Sappleton  | Senior Manager, Child and Family-Centred Care & Health Equity, Sickkids Hospital | Pediatrics                                                        |
| Dee Lender       | Executive Director, Ontario Association of Residents' Councils                   | Long-term care                                                    |
| Sharron Cooke    | President, Ontario Association of Residents' Councils                            | Long-term care                                                    |
| David Kent       | Vice-President, Ontario Association of Residents' Councils                       | Long-term care                                                    |
| Lisa Morris      | Communications and Outreach Manager, Lived Experience and Recovery Network       | Mental Health                                                     |
| Kari Sterling    | Regional Director, Lived Experience and Recovery Network                         | Mental Health                                                     |
| Devon McFarlane  | Director, Rainbow Health Ontario                                                 | LGTBQ2ST                                                          |
| Karen Okrainec   | Physician, UHN                                                                   | Multiple Admissions                                               |
| Mary Salmon      | Discharge Planner/Patient Flow, North Bay Regional Health Centre                 | Rural                                                             |
